# Supplementary material
Source: Springer Nature journal article supplement (https://www.springermedizin.de/resource/supplementary/12885_2013_4444_MOESM1_ESM.pdf/9466286)

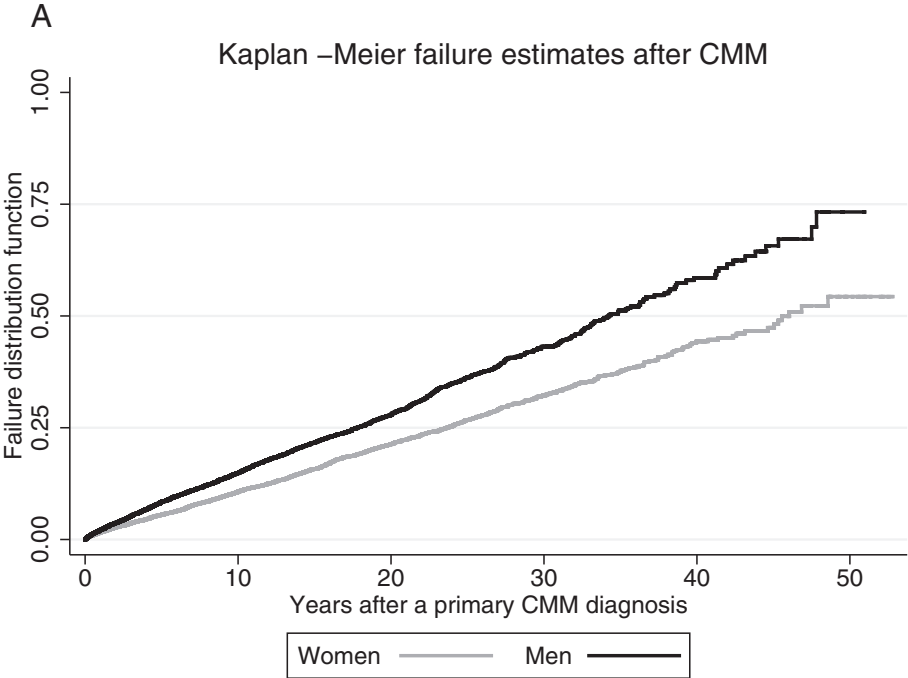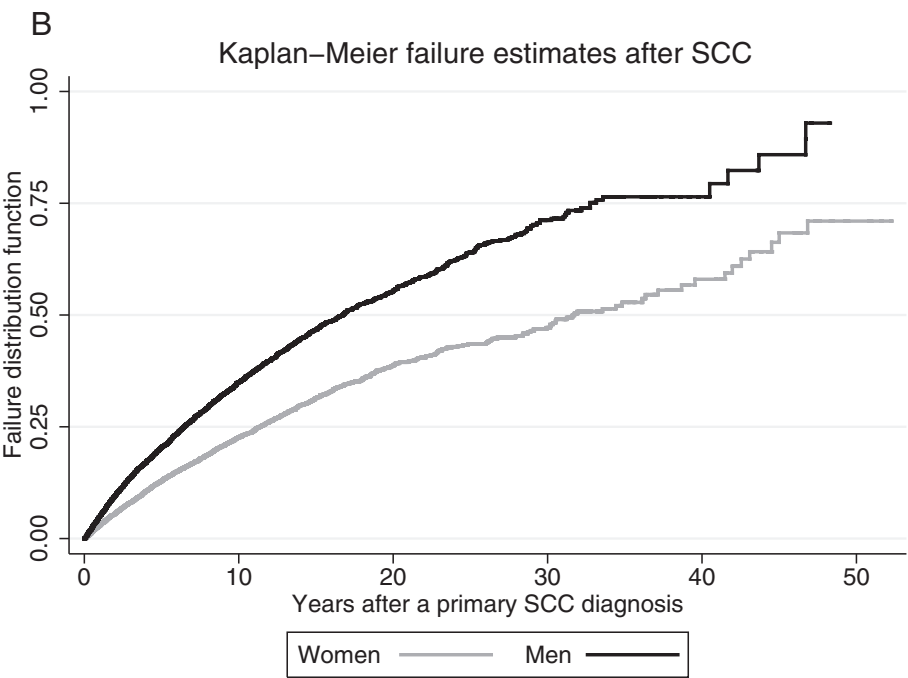

Supplement: MOESM1 [file 9466286]
